28 various tissues and cells of plants and animals. These proteins can reversibly bind to phospholipid  
29 membranes and to calcium ions ( $\text{Ca}^{2+}$ ). To date, several studies have confirmed that some members of  
30 the Annexin family regulate the antiviral innate immune response. Until now, regulation of the  
31 production of type I IFN by ANXA2 is not reported. In this study, ANXA2 were found to strongly inhibit  
32 the production of type I IFN, leading to increased virus replication while knockout of ANXA2 expression  
33 inhibited virus replication by increasing the amount of IFN. Compared with wild-type littermates,  
34 ANXA2 deficiency mice produced more type I IFN to inhibit virus replication. Our results provide  
35 mechanistic insights into the novel role of ANXA2 in the antiviral innate immune responses.

## 36 **Introduction**

37 Innate immunity, also known as non-specific immunity or natural immunity, is the first line of  
38 defense against pathogenic microorganism infection and plays a key role in regulating host antiviral  
39 responses to eliminate pathogens. Upon a pathogen infection, the pattern recognition receptors (PRRs)  
40 can recognize the conserved molecular structures of the pathogen called pathogen-associated molecular  
41 patterns (PAMPs), including viral DNA, viral RNA and surface glycoproteins[1]. The known PRRs  
42 include the Toll-like receptors (TLRs), the retinoic acid-inducible gene I (RIG-I)-like receptors (RLRs),  
43 the nucleotide-binding domain and leucine-rich repeat-containing receptors (NLRs), the C-type lectin  
44 receptors (CLRs), and the PYRIN family members[2].

45 It is well known that RIG-I and MDA5 are well-conserved RLRs that recognize viral RNAs in the  
46 process of RNA virus infection[3]. Although RIG-I and MDA5 play non-redundant roles by detecting  
47 different RNA viruses and by recognizing distinct features of viral RNAs, they share the same  
48 downstream adaptor molecule, MAVS (also known as IPS-1, VISA or Cardif). Upon RNA virus  
49 infection, the carboxy-terminal domain of RIG-I/MDA5 interacts with viral RNA to promote  
50 conformational changes of RIG-I/MDA5, which promote them to oligomerize[3] and expose their own  
51 caspase activation recruitment domain (CARD). RIG-I/MDA5 CARD interacts with the CARD domain  
52 of a mitochondrial antiviral signal protein, MAVS, resulting in recruiting TRAFs to the linker between  
53 CARD and TM of MAVS[4], which in turn activates TBK1, IKK $\epsilon$ [5], resulting in the phosphorylation  
54 and translocation of IRF3 to nucleus[6] to produce type I IFN.

55 Upon DNA virus infection, the cyclic GMP-AMP (cGAMP) synthase (cGAS) senses the viral DNA

56 and catalyzes ATP-GTP transformation to produce the second messenger 2'3'-cGAMP, which further  
57 binds to stimulator of interferon genes (STING). Subsequently, the STING travels from the endoplasmic  
58 reticulum (ER) to the ER-Golgi intermediate compartment (ERGIC) and the Golgi apparatus[7-9].  
59 During this process, the carboxy-terminal of STING recruits and activates the TBK1, then the activated  
60 TBK1 phosphorylates IRF3[10-13]. The phosphorylated IRF3 forms a homodimer, which is then  
61 translocated to the nucleus and binds to the interferon stimulus response element (ISRE) of the target  
62 genes to induce type I IFN production[14-16].

63 Annexin A2 (ANXA2, also known as calpactin I or lipocortin II) is a multifunctional protein that  
64 can reversibly bind to phospholipid membranes and calcium ions ( $\text{Ca}^{2+}$ )[17]. ANXA2 belongs to the  
65 membrane scaffold and binding protein, and is mainly expressed in the plasma membrane and  
66 intracellular vesicles[18, 19]. Although ANXA2 exists in the cytoplasm as a monomer, it generally exists  
67 as a heterotetrameric complex composed of S100A10 dimer and two ANXA2 molecules[20, 21]. It has  
68 been reported that ANXA2 participates in the replication process of a variety of viruses. For examples,  
69 ANXA2 interacts with the matrix (M) protein of viruses (such as measles virus and bovine transient fever  
70 virus), which is located on the inner surface of the virus envelope and plays a role in the formation of  
71 viral particles, thereby contributing to the assembly and release of the virus[22, 23]. ANXA2 also  
72 participates in Classic swine fever virus (CSFV) and Hepatitis C virus (HCV) production process by  
73 binding to the NS5A protein[24]. ANXA2 can induce the formation of lipid raft microdomains by  
74 recruiting the HCV NS protein and enriching it in lipids, which promotes the formation of the HCV  
75 replication complex[25]. In addition, ANXA2 interacts with viral-encoded proteins such as avian  
76 influenza virus (AIV) and porcine reproductive and respiratory syndrome virus (PRRSV) to enhance  
77 virus replication[26, 27]. However, the role of ANXA2 in regulating type I IFN production remains  
78 poorly understood.

79 In this study, we identified ANXA2 as a negative regulator in the type I IFN production We  
80 presented biochemical and genetic evidence that ANXA2 regulated type I IFN production through  
81 multiple mechanisms. ANXA2 not only inhibited MDA5 recruiting MAVS and MAVS recruiting  
82 TRAF3 upon RNA virus infection, but also inhibited the translocation of STING to Golgi upon HSV-1  
83 infection. In addition, ANXA2 inhibited IRF3 phosphorylation and nuclear translocation by disrupting  
84 the interaction among IRF3, TBK1 and IKK $\epsilon$ , resulting in inhibition of the type I IFN production and

85 enhancement of viral replication.

## 86 **Results**

### 87 **ANXA2 inhibits type I IFN production**

88 To explore the function of ANXA2 in host antiviral responses, we firstly tested the expression of  
89 ANXA2 upon virus infection. The results showed that both RNA virus (vesicular stomatitis virus (VSV),  
90 EMCV) and DNA virus (Herpes simplex virus 1 (HSV-1)) induced ANXA2 expression ([Fig S1](#)),  
91 suggesting that ANXA2 may be involved in host antiviral responses. Further study showed that human  
92 ANXA2 inhibited the activation of the IFN- $\beta$ , IRF7, ISG54, ISRE and NF- $\kappa$ B promoters induced by  
93 Sendai virus (SeV) in a dose-dependent manner ([Fig 1A](#) and [Fig S2A-2D](#)). Similarly, ectopically  
94 expressed ANXA2 significantly inhibited the protein level of the IFN- $\beta$  induced by SeV ([Fig 1B](#)).  
95 Additionally, the inhibitory effects of ectopic expressed ANXA2 on the mRNA levels of *Ifn $\beta$ 1* and *Isg56*  
96 were observed after transfection with poly(I:C), cGAMP or infection with other RNA viruses, such as  
97 EMCV, VSV, and DNA virus (HSV-1) ([Fig 1C](#) and [1D](#)).

98 To further confirm these results, HEK293T cells with ANXA2 gene deletion (HEK293T-*Anxa2*<sup>-/-</sup>)  
99 were generated using CRISPR/Cas9 to examine the function of ANXA2. As shown in [Fig 1E](#) and [1F](#),  
100 ANXA2 deficiency markedly increased the mRNA levels of *Ifn $\beta$ 1* and *Isg56* induced by infection with  
101 EMCV, VSV and HSV-1 or transfection with poly(I:C) or cGAMP. Of note, HEK293T-*Anxa2*<sup>-/-</sup> cells  
102 transfected with a plasmid expressing ANXA2 significantly reduced the mRNA expression levels of  
103 *Ifn $\beta$ 1* which were enhanced by ANXA2 deficiency ([Fig 1G](#) and [1H](#)). An IFN sensitivity result showed  
104 that the replication levels of the HSV-1-GFP and VSV-GFP correlated with the expression level of  
105 ANXA2 ([Fig 1I](#), [Fig S2E](#) and [2F](#)). Taken together, our findings demonstrated that ANXA2 inhibits type  
106 I IFN production.

### 107 **ANXA2 deficiency enhances cellular antiviral responses *in vitro***

108 To study the function of ANXA2 in type I IFN production *in vivo*, we generated *Anxa2* knock out  
109 (*Anxa2*<sup>-/-</sup>) mice using a homologous recombination technique and validated them by sequencing and  
110 Western blot analysis ([Fig S3A-C](#)). Primary peritoneal macrophages isolated from *Anxa2*<sup>-/-</sup> mice and their

111 wildtype (WT) littermates were infected with EMCV, VSV or HSV-1 for 0, 4, 8, and 12 h. Compared to  
112 macrophages from WT mice, macrophages from *Anxa2*<sup>-/-</sup> mice infected with these viruses showed higher  
113 mRNA expression of *Ifnβ1* (Fig 2A-C), *Isg56* (Fig 2D-F) and *Mx1* (Fig 2G-I) at different time points.  
114 Furthermore, the VSV and EMCV genomic RNA copy number and the HSV-1 genomic DNA copy  
115 number in peritoneal macrophages from *Anxa2*<sup>-/-</sup> mice were significantly lower than that of the primary  
116 peritoneal macrophages from WT mice at 0, 4, 8, and 12 hpi (Fig 2J-L). Consistent with these results,  
117 the mRNA levels of *Ifnβ1*, *Isg56* and *Mx1* in the HeLa-*Anxa2*<sup>-/-</sup> cells infected with EMCV, VSV or HSV-  
118 1 were also higher than that of in the WT HeLa cells (Fig S3D-L). Moreover, the VSV and EMCV  
119 genomic RNA copy number and the HSV-1 genomic DNA copy number were significantly lower in the  
120 HeLa-*Anxa2*<sup>-/-</sup> cells than that of in the HeLa cells (Fig S3M-O). Collectively, these results indicated that  
121 the ANXA2 deficiency enhanced the type I IFN production, which resulted in the inhibition of viral  
122 replication.

### 123 **ANXA2 deficiency enhances host antiviral responses *in vivo***

124 To further define the function of ANXA2 in inhibiting type I IFN production and host antiviral  
125 responses *in vivo*, *Anxa2*<sup>-/-</sup> mice and their WT littermates were challenged with EMCV via intraperitoneal  
126 injections. We found that the mRNA levels of *Ifnβ1* in the heart and brain from *Anxa2*<sup>-/-</sup> mice were  
127 significantly higher than those from WT mice after infection with EMCV for 48 h (Fig 3A and 3B) and  
128 72 h (Fig 3C and 3D). Correspondingly, the protein levels of IFN-β in serum from *Anxa2*<sup>-/-</sup> mice were  
129 also significantly increased (Fig 3E). Consistent with these results, the EMCV genomic RNA copy  
130 number in the heart were significantly lower in *Anxa2*<sup>-/-</sup> mice than that of their WT littermates (Fig 3F).  
131 Fewer signs of severe inflammation were observed in the brain and heart tissues from *Anxa2*<sup>-/-</sup> mice than  
132 in those from their WT littermates (Fig 3G). Additionally, brain tissues from WT littermates infected  
133 with EMCV exhibited severe glial cell and nerve cell degenerative necrosis, while those from *Anxa2*<sup>-/-</sup>  
134 mice exhibited few signs of glial cell and nerve cell degeneration (Fig 3G and 3H).

### 135 **ANXA2 inhibits type I IFN production upstream of IRF3 phosphorylation**

136 To elucidate the underlying molecular mechanisms by which ANXA2 negatively regulates type I  
137 IFN production, we first assessed the effect of ANXA2 on the IFN-β promoter activation induced by key

138 molecules in the type I IFN signal pathway in HEK293T cells. As shown in [Fig S4A-F](#), ectopically  
139 expressed ANXA2 significantly decreased the IFN- $\beta$  promoter activation induced by RIG-I, MDA5,  
140 cGAS+STING, MAVS, TBK1, or IKK $\epsilon$  in a dose-dependent manner, while the activation of IFN- $\beta$   
141 promoter induced by IRF3-5D (a constitutively active IRF3) was not affected ([Fig S4G](#)). To further  
142 confirm these results, HEK293T cells were transfected with a plasmid expressing RIG-I, MDA5,  
143 cGAS+STING, MAVS, TBK1, or IKK $\epsilon$ , along with HA-ANXA2, the qPCR analysis showed that the  
144 ectopic expression of ANXA2 reduced the mRNA levels of *Irf3* induced by the indicated molecules,  
145 but not by IRF3-5D ([Fig 4A](#)). Subsequently, HEK293T-*Anxa2*<sup>+/+</sup> and HEK293T-*Anxa2*<sup>-/-</sup> cells were  
146 transfected with a plasmid expressing RIG-I, MDA5, cGAS+STING, MAVS, TBK1, or IKK $\epsilon$ , along  
147 with IFN- $\beta$  and ISRE promoter reporters. We found that the IFN- $\beta$  and ISRE promoter activation  
148 mediated by RIG-I, MDA5, cGAS+STING, MAVS, TBK1 and IKK $\epsilon$  was significantly increased in  
149 HEK293T-*Anxa2*<sup>-/-</sup> cells compared to HEK293T-*Anxa2*<sup>+/+</sup> cells. Additionally, overexpression of  
150 ANXA2 in HEK293T-*Anxa2*<sup>-/-</sup> cells restored the inhibitory effects of ANXA2 on RIG-I-, MDA5-,  
151 cGAS+STING-, MAVS-, TBK1- and IKK $\epsilon$ -mediated IFN- $\beta$  and ISRE promoter activation but not IRF3-  
152 5D ([Fig 4B, C](#)). These results suggest that ANXA2 may inhibit type I IFN production upstream of IRF3  
153 phosphorylation.

154 To examine whether ANXA2 inhibits IRF3 phosphorylation, HEK293T cells were transfected with  
155 an empty vector or a plasmid expressing HA-tagged ANXA2, respectively. These cells were then mock  
156 infected or infected with VSV, EMCV or HSV-1. We found that ectopically expressed ANXA2  
157 significantly inhibited the phosphorylation of IRF3 induced by VSV, EMCV or HSV-1 infection ([Fig](#)  
158 [4D-F](#)). Similarly, ectopically expressed ANXA2 reduced poly(I:C)- or SeV-induced IRF3  
159 phosphorylation in a dose-dependent manner ([Fig S5A and 5B](#)). Subsequently, primary peritoneal  
160 macrophages from *ANXA2*<sup>-/-</sup> mice and their wildtype littermates were infected with VSV or HSV-1. As  
161 shown in [Fig 4G and 4H](#), the phosphorylation levels of IRF3 in primary peritoneal macrophages from  
162 *ANXA2*<sup>-/-</sup> mice were higher than those from WT mice infected with VSV or HSV-1, although the total  
163 protein levels of IRF3 were not affected. Consistent with these results, the phosphorylation level of IRF3  
164 in the HeLa-*Anxa2*<sup>-/-</sup> cells was higher than that in the wild type HeLa cells, and overexpression of  
165 ANXA2 in HeLa-*Anxa2*<sup>-/-</sup> cells restored the inhibitory effects of ANXA2 on SeV-mediated  
166 phosphorylation of IRF3 ([Fig S5C](#)).

167 It has been shown that the phosphorylation of IRF3 results in its translocation to nucleus. Therefore,  
168 we further studied the effect of ANXA2 on IRF3 nuclear translocation. As shown in [Fig 4I and Fig S5D](#),  
169 the amount of nuclear-translocated IRF3 was significantly reduced following ANXA2 expression upon  
170 SeV and EMCV infection. In agreement with these results, Western blot analysis of the protein level of  
171 IRF3 in the cytoplasmic and nuclear fractions showed that the amount of nuclear translocation of IRF3  
172 induced by VSV infection decreased in a dose-dependent manner with the increasing expression of  
173 ANXA2, while knockout of ANXA2 expression significantly enhanced the nuclear translocation of IRF3  
174 upon VSV infection ([Fig 4J and 4K](#)). Overall, our findings reveal that ANXA2 inhibits the  
175 phosphorylation and nuclear translocation of IRF3 induced by DNA virus or RNA virus infection.

#### 176 **ANXA2 inhibits the interaction of MDA5-MAVS and MAVS-TRAF3 induced by RNA virus**

177 To identify the target of ANXA2, we examined the interaction between ANXA2 and key molecules  
178 involved in RLRs-mediated and cGAS-STING signaling pathway including RIG-I, MDA5, cGAS,  
179 STING, MAVS, TBK1, IKK $\epsilon$  and IRF3. As shown in [Fig 5A](#), ANXA2 co-immunoprecipitated with  
180 MDA5, MAVS, STING and IRF3 when these proteins were co-expressed with these proteins in  
181 HEK293T cells. To validate the interaction between ANXA2 and MDA5, plasmids expressing HA-  
182 ANXA2 and Flag-MDA5 were co-transfected into HEK293T cells. The results showed that ANXA2 and  
183 MDA5 were co-immunoprecipitated ([Fig 5B](#)). Consistent with the result, endogenous MDA5 also  
184 interacted with endogenous ANXA2 regardless of mock infection or infection of EMCV ([Fig 5C](#)). To  
185 identify which domain of MDA5 is necessary for its interaction with ANXA2, five truncated mutants of  
186 MDA5 (MDA5- $\Delta$ C1, MDA5- $\Delta$ C2, MDA5- $\Delta$ ATP, MDA5- $\Delta$ CTD and MDA5-CARD) were constructed,  
187 and Co-IP experiments were performed. As shown in [Fig 5D](#), ANXA2 interacted with MDA5-WT,  
188 MDA5- $\Delta$ C1, MDA5- $\Delta$ ATP, MDA5- $\Delta$ CTD and MDA5-CARD but not with MDA5- $\Delta$ C2, suggesting  
189 that the CARD domain of MDA5 is required for its interaction with ANXA2. Upon EMCV infection,  
190 MDA5 firstly senses EMCV genomic RNA, and then recruits MAVS through its CARD domain[28].  
191 Therefore, we tested the interaction between MDA5 and MAVS and found that ANXA2 inhibited the  
192 recruitment of MAVS by MDA5 ([Fig 5E](#)). Consistent with the result, the interaction between MDA5 and  
193 MAVS was increased in HEK293T- *Anxa2*<sup>-/-</sup> cells compared with the HEK293T- *Anxa2*<sup>+/+</sup> cells upon  
194 EMCV infection ([Fig 5F](#)).

195 The interaction between ectopic expressed ANXA2 and MAVS or between endogenous ANXA2  
196 and MAVS in mock infected or EMCV infected HEK293T cells were examined by Co-IP ([Fig 6A and](#)  
197 [6B](#)). Similarly, we generated four deletion mutants of MAVS bearing various combinations of the  
198 different domains to identify its binding domain to ANXA2. The results showed that MAVS-WT,  
199 MAVS- $\Delta$ CARD, MAVS- $\Delta$ N and MAVS- $\Delta$ TM interacted with ANXA2, but not MAVS-N, suggesting  
200 that ANXA2 interacted with MAVS is dependent on the linker between CARD and TM of MAVS ([Fig](#)  
201 [6C](#)). It showed that the linker between CARD and TM of MAVS is necessary for its recruitment of  
202 TRAFs[29]. To detect the effect of ANXA2 on the interaction between MAVS and TRAF3, a plasmid  
203 expressing Flag-MAVS was transfected into HEK293T cells alone or together with a plasmid expressing  
204 HA-TRAF3 and increasing amount of a plasmid expressing GFP-ANXA2. As shown in [Fig 6D](#), ANXA2  
205 inhibited the interaction between MAVS and TRAF3 in a dose-dependent manner. Consistent with the  
206 above results, the interaction between MAVS and TRAF3 was enhanced in HEK293T-*Anxa2*<sup>-/-</sup> cells  
207 compared to that in the wild type HEK293T cells upon EMCV infection ([Fig 6E](#)). Of note, the location  
208 of MAVS on the mitochondria was not affected upon overexpression or deletion of ANXA2 ([Fig 6F and](#)  
209 [Fig 6G](#)).

210 Taken together, these data demonstrate that ANXA2 not only inhibits the recruitment of MAVS by  
211 MDA5 through interaction with the CARD domain of MDA5, but also inhibits the recruitment of TRAF3  
212 by MAVS through interaction with the linker between CARD and TM of MAVS.

### 213 **ANXA2 inhibits the localization of STING on Golgi apparatus induced by DNA virus**

214 STING has been recognized as an activator of immune responses via TBK1/IRF3 pathway, and it  
215 is suggested to play critical roles in host defense against DNA virus[11, 30]. To confirm the interaction  
216 between ANXA2 and STING, plasmids expressing Flag-STING and HA-ANXA2 were co-transfected  
217 into HEK293T cells. The results of Co-IP showed that Flag-STING interacted with HA-ANXA2 ([Fig](#)  
218 [7A](#)). In addition, we found that interactions existed between endogenous ANXA2 and endogenous  
219 STING in HEK293T cells with or without HSV-1 infection ([Fig 7B](#)). To map the STING domain required  
220 for the interaction with ANXA2, we constructed four different plasmids encoding Flag-tagged deleted  
221 STING mutants (STING-TM, STING- $\Delta$ C, STING-CDN, STING- $\Delta$ TM). The results revealed that  
222 ANXA2 interacted with STING-TM and STING- $\Delta$ C, but not STING-CDN or STING- $\Delta$ TM, suggesting

223 that the TM of STING is dispensable for the interaction between ANXA2 and STING ([Fig 7C](#)). Next,  
224 we further explored whether ANXA2 affects the positioning of STING in the Golgi apparatus after  
225 activation. As shown in [Fig 7D](#), the ectopic expression of cGAS promotes the transport of STING from  
226 the ER to the Golgi, whereas ANXA2 inhibits the localization of STING on the Golgi apparatus.

## 227 **ANXA2 disrupts TBK1-IKK $\epsilon$ -IRF3 complex formation mediated by both RNA virus and DNA** 228 **virus**

229 Both DNA and RNA virus activate TBK1/IRF3 pathways. To detect the interaction between  
230 ANXA2 and IRF3, plasmids expressing Flag-IRF3 and HA-ANXA2 were co-transfected into HEK293T  
231 cells. The result of Co-IP showed that Flag-IRF3 interacted with HA-ANXA2 ([Fig 8A](#)). In addition, we  
232 also found that interactions existed between endogenous ANXA2 and endogenous IRF3 in HEK293T  
233 cells infected with VSV ([Fig 8B](#)) or HSV-1 ([Fig 8C](#)). Immunofluorescence staining revealed that  
234 ANXA2 colocalized with IRF3 in the cytoplasm ([Fig 8D](#)). IRF3 contains four different domains: an N-  
235 terminal DNA binding domain (DBD), an IRF association domain (IAD), a C-terminal regulatory  
236 domain (RD), and a nuclear export sequence (NES). To map the regions of IRF3 responsible for the  
237 interaction with ANXA2, five different plasmids encoding Flag-tagged deleted IRF3 mutants (IRF3-D<sub>1</sub>:  
238 1-382 aa, IRF3-D<sub>2</sub>: 1-357 aa, IRF3-D<sub>3</sub>: 1-140 aa, IRF3-D<sub>4</sub>: 141-427 aa, IRF3-D<sub>5</sub>: 201-427 aa) were  
239 constructed, and Co-IP experiments were performed. The results revealed that ANXA2 interacted with  
240 IRF3-D<sub>1</sub>, IRF3-D<sub>2</sub> and IRF3-D<sub>4</sub>, but not IRF3-D<sub>3</sub> or IRF3-D<sub>5</sub>, suggesting that the NES domain of IRF3  
241 is required for its interaction with ANXA2 ([Fig 8E](#)). ANXA2 contains two different domains: a C-  
242 terminal domain with four repeats and a unique N-terminal domain[31, 32]. To map the ANXA2 domain  
243 required for the interaction with IRF3, we constructed six different plasmids encoding HA-tagged deleted  
244 ANXA2 mutants (ANXA2-D<sub>1</sub>: 1-102 aa, ANXA2-D<sub>2</sub>: 1-174 aa, ANXA2-D<sub>3</sub>: 1-259 aa, ANXA2-D<sub>4</sub>: 50-  
245 340 aa, ANXA2-D<sub>5</sub>: 122-340 aa, ANXA2-D<sub>6</sub>: 207-340 aa). As shown in [Fig 8F](#), ANXA2-D<sub>2</sub>, ANXA2-  
246 D<sub>3</sub>, ANXA2-D<sub>4</sub>, ANXA2-D<sub>5</sub> and ANXA2-D<sub>6</sub> interacted with IRF3, but not ANXA2-D<sub>1</sub>, suggesting that  
247 the C-terminal region, especially the four repeated sequence, is indispensable for the interaction between  
248 ANXA2 and IRF3. Next, we tried to identify which domain of ANXA2 is required for its inhibition of  
249 TBK1-mediated IFN- $\beta$  production. We found that ANXA2-D<sub>2</sub>, ANXA2-D<sub>3</sub>, ANXA2-D<sub>4</sub> and ANXA2-  
250 D<sub>5</sub>, but not ANXA2-D<sub>1</sub> or ANXA2-D<sub>6</sub>, inhibited IFN- $\beta$ -luc reporter activation and the mRNA expression

251 levels induced by TBK1 ([Fig 8G and 8H](#)).

252 Previous studies showed that TBK1 and IKK $\epsilon$  are TRAF family member-associated NF- $\kappa$ B  
253 activator (TANK)-binding partners and the tricomplex (TBK1-IKK $\epsilon$ -IRF3) is involved in participating  
254 in the type I IFN production[33, 34]. Activated TBK1 and IKK $\epsilon$  phosphorylates the serine residues in  
255 IRF3, causing conformational changes and homogeneous dimerization of IRF3, followed by its nuclear  
256 translocation and activation of target gene transcription [35-37]. Therefore, we speculated that ANXA2  
257 might inhibit IRF3 phosphorylation by blocking the interaction between TBK1 or IKK $\epsilon$  and IRF3. The  
258 Co-IP results confirmed our hypothesis, as overexpressed ANXA2 markedly disrupted the interaction  
259 between TBK1 and IRF3 ([Fig 9A](#)) as well as the interaction between IKK $\epsilon$  and IRF3 ([Fig 9B](#)) in a dose-  
260 dependent manner. Consistent with these results, the lack of ANXA2 expression significantly increased  
261 the interaction of the endogenous TBK1-IRF3 and IKK $\epsilon$ -IRF3 upon VSV and HSV-1 infection in the  
262 HEK293T cells ([Fig 9C and 9D](#)) or mouse primary peritoneal macrophages ([Fig 9E and 9F](#)). Overall,  
263 our findings reveal that ANXA2 competes with TBK1 or IKK $\epsilon$  in binding to the IRF3, leading to the  
264 inhibition of IRF3 phosphorylation and nuclear translocation.

265 Taken together, both RNA virus and DNA virus infection induced ANXA2 expression to inhibit  
266 type I IFN production. Mechanistically, ANXA2 not only inhibits the recruitment of MAVS by MDA5  
267 and the interaction between MAVS and TRAF3 upon RNA virus infection, but also inhibits the location  
268 of STING on Golgi apparatus upon DNA virus infection. Additionally, ANXA2 disrupts  
269 TBK1/IKK $\epsilon$ /IRF3 complex formation through competing with TBK1 or IKK $\epsilon$  binding to IRF3, which  
270 leads to reduction of phosphorylation and nuclear translocation of IRF3 and decreased type I IFN  
271 production ([Fig 10](#)).

## 272 Discussion

273 Annexins are a family of evolutionary conserved multifunctional proteins, which widely distributed  
274 in various tissues and cells of plants and animals, and can reversibly bind to phospholipid membranes  
275 and to calcium ions (Ca<sup>2+</sup>)[17]. Annexins can not only participate in the occurrence of various membrane  
276 events regulated by Ca<sup>2+</sup>, such as membrane transport, cytoskeleton formation[38, 39], and ion channel  
277 establishment[40-42], but also are related to cell apoptosis and tumorigenesis[43-45]. Recently,  
278 increasing evidence has demonstrated that annexins play important roles in innate immune and

279 inflammatory responses[46, 47]. It has been reported that in the TLR4/TLR3-TRIF signaling pathway,  
280 the C-terminus of ANXA1 directly associates with TBK1 to promote the TLRs-mediated IFN- $\beta$   
281 production, indicating that ANXA1 plays an important role in regulating host antiviral responses[48].  
282 ANXA1 is not only related to IFN production signaling pathways, but can also affect IFN downstream  
283 signaling pathway. For example, ANXA1 rapidly promotes IFN- $\beta$  production and IRF3 activation after  
284 RIG-I stimulation, while knockdown of ANXA1 expression delays the phosphorylation of IRF3 and  
285 STAT1, leading to lower expression of ISGs, such as IFIT1[49]. ANXA7, another Annexin member,  
286 enhances the IFN- $\beta$  promoter activity induced by chicken MDA5 (chMDA5), thereby inhibiting the  
287 infection of the recombinant H5N1 virus (rNS1-SD30) lacking the eIF4GI binding domain of NS1[50].

288 As a membrane scaffold and binding protein, ANXA2 is mainly expressed in the plasma membrane  
289 and intracellular vesicles[18, 19], where it participates in the replication process of a variety of viruses.  
290 For example, ANXA2 interacts with the non-structural protein 1 (NS1) of AIV to increase the viral  
291 replication[26]. Our previous studies also showed that ANXA2 interacts with the non-structural proteins  
292 9 (NSP9) of PRRSV to promote viral replication, and Vimentin interacts with the N protein of PRRSV  
293 in the case of ANXA2[27]. In this study, we noticed that virus infection induced ANXA2 expression,  
294 subsequently, we found that overexpression of ANXA2 inhibited both RNA viruses (SeV, VSV, or  
295 EMCV) and DNA virus (HSV-1)-induced IFN- $\beta$  production, whereas ANXA2 deficiency enhanced type  
296 I IFN production and suppressed virus replication *in vitro* and *in vivo*. ANXA2 interacted with IRF3 to  
297 inhibit type I IFN production by blocking the phosphorylation and nuclear translocation of IRF3 induced  
298 by RNA virus and DNA virus.

299 RIG-I-like helicases, such as RIG-I, MDA5, and LGP2, act as important cytosolic PRRs to sense  
300 viral dsRNA. RIG-I and MDA5 transduces antiviral signal through interacting with MAVS via CARD  
301 domain. MAVS consists of three domains, including CARD domain, TM domain and the linker between  
302 CARD and TM. MAVS recruits TRAF3 through the linker between CARD and TM to activate  
303 downstream kinases such as TBK1 and IKK $\epsilon$  to phosphorylate IRF3, leading to increased production of  
304 type I IFN and expression of antiviral genes[5, 51]. In this study, we found that ANXA2 not only  
305 interacted with MDA5 through CARD domain to inhibit its recruitment of MAVS but also interacted  
306 with the linker between CARD and TM of MAVS to inhibit the interaction between MAVS and TRAF3.

307 Upon DNA virus infection, the cGAS senses and binds to the viral DNA and catalyzes formation

308 of 2'-3'-cGAMP, an atypical cyclic di-nucleotide second messenger that can be sensed by STING. STING  
309 translocates from ER to Golgi, leading to phosphorylation of STING. In this study, we found that  
310 ANXA2 interacted with the TM domain of STING and inhibited its localization on Golgiosome and  
311 phosphorylation. Activated STING recruited and activated TBK1[52]. Therefore, the type I IFN signaling  
312 triggered by RNA virus and DNA virus converges on TBK1. Activated TBK1 phosphorylates IRF3 and  
313 promotes its dimerization and translocation into the nucleus, where it forms an active transcriptional  
314 complex that binds to IFN promoter and triggers the type I IFN genes transcription[53, 54].

315 Normally, IRF3 mainly exists in the cytoplasm and can shuttle between cytoplasm and nucleus. The  
316 NLS and NES in IRF3 are constitutively active, but nuclear export is normally dominant. Following viral  
317 infection, activated TBK1 and IKK $\epsilon$  interact with the IAD of IRF3 and phosphorylate IRF3, which  
318 promotes IRF3 to translocate into the nucleus to induce type I IFN production[15, 55]. IRF3 accumulates  
319 in the nucleus, and this accumulation relies on the function of its NLS[56]. To date, several studies  
320 demonstrated that some host proteins inhibit IRF3 activation by directly interacting with IRF3. For  
321 instances, TRIM26 binds to IRF3 and promotes its K48-linked polyubiquitination and degradation in  
322 nucleus[57]. Our previous study also showed that DDX19 inhibits TBK1- and IKK $\epsilon$ -mediated  
323 phosphorylation of IRF3 by competing with TBK1 or IKK $\epsilon$  binding to the IAD domain of IRF3[58]. In  
324 this study, we found that ANXA2 inhibited IRF3 phosphorylation and nuclear entry induced by both  
325 RNA virus and DNA virus by inhibiting TBK1/IKK $\epsilon$ /IRF3 complex formation. Unexpectedly, ANXA2  
326 competed with IRF3 to bind to TBK1/IKK $\epsilon$  through interacting with the NES domain but not the IAD  
327 domain of IRF3. This may be caused by the steric hindrance related to the structure of ANXA2, which  
328 requires further study to confirm.

329 ANXA2 is an abundant protein that associates with biological membranes as well as the actin  
330 cytoskeleton. It has been implicated in intracellular vesicle fusion, the organization of membrane  
331 domains, lipid rafts and membrane-cytoskeleton contacts. It consists of a highly conserved core domain  
332 of four homologous repeats of 70–80 amino acids called the annexin repeats and a unique 30-amino-acid  
333 long N-terminal ‘head domain’[32, 59]. In this study, we found that 102-207 aa of ANXA2 is required  
334 to inhibit TBK1 induced IFN- $\beta$  promoter activation, and 102-339 aa of ANXA2 is necessary to interact  
335 with IRF3.

336 ANXA2 plays an essential role in the regulation of innate immune response. A report demonstrated

337 that ANXA2 plays an anti-inflammatory role in response to injury or viral infection[60]. Another  
338 previous study showed that ANXA2 has a role in limiting inflammation by promoting anti-inflammatory  
339 signals[61]. In agree with these, the mice lacking ANXA2 showed a lower survival rate when they were  
340 infected with bacteria, reflecting a dysregulated inflammatory response[62]. Using the ANXA2 knockout  
341 mice as model, we demonstrated that IFN- $\beta$  production significantly increase in primary peritoneal  
342 macrophages from *Anxa2*<sup>-/-</sup> mice upon EMCV infection compared to that from wild type mice, which in  
343 turn inhibited viral replication. These data suggest that ANXA2 is a negative regulator of IFN- $\beta$   
344 production and antiviral immune response during viral infection *in vivo*. Therefore, the virus infection  
345 may limit IRF3 activation and IFN- $\beta$  production by inducing ANXA2 expression, thereby promoting its  
346 escape from the host innate immune responses.

347 In summary, we identified a novel function of ANXA2 involved in host antiviral responses.  
348 Mechanistically, ANXA2 negatively regulates IFN- $\beta$  production by targeting MDA5, MAVS, STING  
349 and IRF3. ANXA2 disrupts the interaction of MDA5-MAVS and MAVS-TRAF3 upon RNA virus  
350 infection while inhibits the localization of SITNG on Golgi apparatus upon DNA virus infection.  
351 ANXA2 also inhibits TBK1 and IKK $\epsilon$  in binding to IRF3 through interaction with IRF3. Understanding  
352 these processes may shed light on ANXA2's new function in viral infection-mediated type I IFN  
353 production. Therefore, this study provides a novel target for anti-viral drug design to prevent viral  
354 invasion.

## 355 **Materials and Methods**

### 356 **Mice**

357 *Anxa2*<sup>-/-</sup> mice generated by homologous recombination technology were purchased from Saiye,  
358 Biotechnology Co., Ltd (Guangzhou, China). The mouse genotype was confirmed by PCR using the  
359 following primers: forward 5'-CAACTGAGGCACACTCACAAGCG-3', and reverse 5'-  
360 GAGAAGGGCTGGCTTAGGGCACT-3' and 5'-ACTGTGCTGTGAATGCCACCTTG-3'. All mice  
361 were generated and housed in specific pathogen-free (SPF) barrier facilities at the Harbin Veterinary  
362 Research Institute (HVRI) of the Chinese Academy of Agricultural Sciences (CAAS) (Harbin, China).  
363 All animal experiments were performed according to animal protocols approved by the Subcommittee  
364 on Research Animal Care at the HVRI. Male and female *Anxa2*<sup>-/-</sup> and wild-type littermates (6-8 weeks

365 old) were used throughout the experiments.

#### 366 **Cell lines**

367 Human HEK293T and HeLa cells were purchased from American Type Culture Collection  
368 (Manassas, VA). Peritoneal macrophages were isolated from mice 3 days after injection of thioglycollate  
369 (MERCK) and cultured in RPMI 1640 medium supplemented with 10% fetal bovine serum (FBS), 100  
370 U/mL penicillin and 100 mg/mL streptomycin at 37°C with 5% CO<sub>2</sub>. Human HEK293T and HeLa cells  
371 were cultured in Dulbecco's Modified Eagle's Medium (DMEM) supplemented with 10% FBS, 100  
372 U/mL penicillin, and 100 mg/mL streptomycin at 37°C with 5% CO<sub>2</sub>. *Anxa2*<sup>-/-</sup> and wild type HeLa cell  
373 lines were purchased from Edigene Inc. (Beijing, China).

#### 374 **Viruses**

375 The Sendai/Cantell strain (SeV strain, product code VR-907) was purchased from the American  
376 Type Culture Collection (ATCC) and amplified in specific pathogen-free eggs. The EMCV HB10 strain  
377 was provided by Prof. Shangjin Cui and the VSV and VSV-GFP were kindly provided by Prof. Zhigao  
378 Bu (HVRI, China). HSV-1 was kindly provided by Prof. Hongbin Shu (Wuhan University, China).

#### 379 **Plasmids**

380 Plasmids expressing Flag-tagged RIG-I, MDA5, cGAS, STING, MAVS, TANK, TBK1, IKKε, IRF3  
381 and IRF3-5D have been previously described (Huang et al., 2015). The IFN-β reporter, ISRE reporter,  
382 and TK-Renilla reporter were obtained from Prof. Hong Tang. To construct plasmids expressing HA- or  
383 Flag-tagged ANXA2, cDNAs corresponding to the human ANXA2 gene were amplified by standard  
384 reverse transcription-polymerase chain reaction (RT-PCR) using total RNA extracted from HeLa cells  
385 as templates and were then cloned into the pCAGGS-HA/Flag vector. All constructs were validated by  
386 DNA sequencing. The primers used in this study are available upon request (Table 1).

#### 387 **Viral infection**

388 For qRT-PCR or immunoblot analysis, cells ( $2 \times 10^5$ ) were plated 24 h before infection with various  
389 viruses at the indicated time points. For viral replication assays, peritoneal macrophages were infected

390 with EMCV, VSV or HSV-1 for 0, 4, 8, 12 h. Virial replication was analyzed by qRT-PCR analysis. For  
391 mouse infection, six- to eight -week-old age- and sex-matched *Anxa2*<sup>+/+</sup> and *Anxa2*<sup>-/-</sup> littermates were  
392 intraperitoneally injected with EMCV ( $2 \times 10^4$  PFU per mouse) or HSV-1 ( $2 \times 10^7$  PFU per mouse). For  
393 survival experiments, the survival of animals was monitored every day after EMCV infection. The sera  
394 from EMCV-infected mice were collected for ELISA analysis at 48 h and 72 h post infection, and the  
395 heart and brain were collected for qRT-PCR, the EMCV titers or histological analysis.

#### 396 **Luciferase reporter gene assay**

397 Luciferase activities were measured with Dual-Luciferase Reporter Assay System (Promega),  
398 according to the manufacturer's instructions. Data were normalized for transfection efficiency by the  
399 division of Firefly luciferase activity with that of Renilla luciferase.

#### 400 **RNA extraction and qPCR**

401 Total RNA was extracted using TRIzol reagent (Invitrogen), and the reverse transcription products  
402 were amplified using the Agilent-Strata gene MxReal-Time qPCR system with a PrimeScript™ RT  
403 Reagent Kit (Takara). Reverse transcription products were amplified using an Agilent-Strata gene  
404 MxReal-Time qPCR system with TB Green® Premix Ex Taq™ II (Tli RNaseH Plus) (Takara) according  
405 to the manufacturer's instructions. Data were normalized to the level of  $\beta$ -actin expression in each  
406 individual sample. The qPCR primers are listed in Table 2.

#### 407 **IFN sensitivity assay**

408 The cellular supernatants were collected and used to assess for their ability to inhibit vesicular  
409 stomatitis virus-GFP (VSV-GFP) replication. Briefly, the HEK293T cells, HEK293T-*Anxa2*<sup>-/-</sup> cells or  
410 HEK293T-*Anxa2*<sup>-/-</sup> cells overexpressing ANXA2 were infected with SeV at an MOI of 10, and the cell  
411 supernatants were collected and UV-deactivated using a 254 nm UV light source for 15 min. UV-  
412 deactivated cell supernatants were then diluted 1:10 in RPMI-1640 media and added to MDBK cells.  
413 Following a 24 h pre-treatment, MDBK cells were infected with VSV-expressing GFP at an MOI of 5.0  
414 for a duration of 5-8 h. VSV infection was determined by fluorescence under a UV light source.

#### 415 **Co-immunoprecipitation and Western blot analysis**

416 Co-immunoprecipitation and Western blot analysis were performed as previously described [58].  
417 Briefly, for Co-IP, whole cell extracts were lysed in lysis buffer (50 mM Tris-HCl, pH 7.4, 150 mM  
418 NaCl, 5 mM MgCl<sub>2</sub>, 1 mM EDTA, 1% Triton X-100, and 10% glycerol) containing 1 mM PMSF and 1  
419 × protease inhibitor cocktail (Roche). Then, cell lysates were incubated with anti-Flag (M2) beads or  
420 with protein G Plus-Agarose immunoprecipitation reagent (Santa Cruz Biotechnology) together with 1  
421 µg of the corresponding antibodies at 4°C overnight on a roller. The precipitated beads were washed five  
422 times with cell lysis buffer. For Western blot analysis, equal amounts of cell lysates and  
423 immunoprecipitants were resolved by 10-12% sodium dodecyl sulfate polyacrylamide gel  
424 electrophoresis (SDS-PAGE) and were then transferred to a polyvinylidene difluoride (PVDF)  
425 membrane (Millipore). After incubation with primary and secondary antibodies, the membranes were  
426 visualized by ECL chemiluminescence (Thermo Fisher Scientific) or an Odyssey two-color infrared  
427 fluorescence imaging system (LI-COR).

#### 428 **Confocal microscopy analysis**

429 HeLa cells or HEK293T cells were transfected with the indicated plasmids and were then fixed for  
430 20 min in 4% paraformaldehyde in 1 × phosphate-buffered saline (PBS) at pH 7.4. Fixed cells were  
431 permeabilized for 20 min with 0.3% Triton X-100 in 1 × PBS and were then blocked in 1 × PBS with  
432 10% bovine serum albumin (BSA) for 30 min. The cells were incubated with the appropriate primary  
433 antibodies and were then stained with Alexa Fluor 594-labeled goat anti-mouse immunoglobulin G and  
434 Alexa Fluor 488-labeled goat anti-rabbit IgG. The subcellular localization of indicated proteins were  
435 visualized using a Zeiss LSM-880 laser scanning fluorescence microscope (Carl Zeiss AG, Oberkochen,  
436 Germany) under a 63 × oil objective.

#### 437 **Generation of *Anxa2* deficient mice**

438 CRISPR/Cas9 genomic editing for gene deletion was used as previously described[63]. To create  
439 mammalian *Anxa2*<sup>-/-</sup> cells, one CRISPR guide RNA (sgRNA) sequence targeting the ANXA2 locus in  
440 the genome was chosen based on the specificity scores (<http://crispr.mit.edu/>). The sgRNA sequence that

441 was used as follows: ANXA2 sgRNA, 5'-GCACTGAAGTCAGCCTTATCTGG-3'. The sgRNA  
442 sequence was cloned into the pSpCas9 (BB)-2A-GFP plasmid (pX458, Addgene). The construct was  
443 then independently transfected into HEK293T cells. Cells expressing GFP were isolated by flow  
444 cytometry, and single cells were seeded into the 96-well plates. After clonal expansion, ANXA2 protein  
445 expressions in different clones were analyzed by immunoblot, and the genomic DNAs from those clones  
446 that have undetectable ANXA2 protein expressions were extracted and amplified by PCR for ANXA2  
447 gene sequencing.

#### 448 **Histopathology analysis**

449 The brains and hearts of WT and *Anxa2*<sup>-/-</sup> mice infected with the EMCV HB10 strain were fixed in  
450 10% formalin neutral buffer solution overnight. The tissues were embedded in paraffin blocks, and then  
451 sectioned at a 4- $\mu$ m thickness for staining with hematoxylin and eosin in accordance with standard  
452 procedures. The results were analyzed by light microscopy. Representative views of the brain and heart  
453 sections are shown.

#### 454 **Statistical analysis**

455 Statistical analysis was conducted using an unpaired Student's t-test, a two-tailed Student's t-test  
456 and one-way or two-way ANOVA followed by the Bonferroni post-test. P values less than 0.05 were  
457 considered statistically significant. For mouse survival studies, Kaplan-Meier survival curves were  
458 generated and analyzed for statistical significance with GraphPad Prism 6.0. Sample sizes were chosen  
459 by standard methods to ensure adequate power, and no exclusion, randomization of weight or sex or  
460 blinding was used for animal studies.

461 **Acknowledgments**

462 This study was supported by the Natural Science Foundation of Heilongjiang Province of China  
463 (grants No. YQ2020C022), National Natural Science Foundation of China (grants No. 31941002) and  
464 the State Key Laboratory of Veterinary Biotechnology Program (grants No. SKLVBP202101).

465 **References**

466 1. Kawai T, Akira S. The role of pattern-recognition receptors in innate immunity: update on  
467 Toll-like receptors. *Nature immunology*. 2010;11(5):373-84. Epub 2010/04/21. doi:  
468 10.1038/ni.1863. PMID: 20404851.

469

470 2. Lupfer C, Kanneganti TD. Unsolved Mysteries in NLR Biology. *Frontiers in immunology*.  
471 2013;4:285. Epub 2013/09/26. doi: 10.3389/fimmu.2013.00285. PMID: 24062750.

472 3. Yoneyama M, Kikuchi M, Natsukawa T, Shinobu N, Imaizumi T, Miyagishi M, et al. The  
473 RNA helicase RIG-I has an essential function in double-stranded RNA-induced innate antiviral  
474 responses. *Nature immunology*. 2004;5(7):730-7. Epub 2004/06/23. doi: 10.1038/ni1087. PMID:  
475 15208624.

476

477 4. Scott I. The role of mitochondria in the mammalian antiviral defense system. *Mitochondrion*.  
478 2010;10(4):316-20. Epub 2010/03/09. doi: 10.1016/j.mito.2010.02.005. PMID: 20206303;  
479 PubMed.

480

481 5. Seth RB, Sun L, Ea CK, Chen ZJ. Identification and characterization of MAVS, a  
482 mitochondrial antiviral signaling protein that activates NF-kappaB and IRF3. *Cell*.

483 2005;122(5):669-82. Epub 2005/08/30. doi: 10.1016/j.cell.2005.08.012. PMID: 16125763.

484

485 6. Takeuchi O, Akira S. Innate immunity to virus infection. Immunological reviews.

486 2009;227(1):75-86. Epub 2009/01/06. doi: 10.1111/j.1600-065X.2008.00737.x. PMID:

487 19120477.

488

489 7. Zhang X, Shi H, Wu J, Zhang X, Sun L, Chen C, et al. Cyclic GMP-AMP containing mixed

490 phosphodiester linkages is an endogenous high-affinity ligand for STING. Molecular cell.

491 2013;51(2):226-35. Epub 2013/06/12. doi: 10.1016/j.molcel.2013.05.022. PMID: 23747010.

492

493 8. Yin Q, Tian Y, Kabaleeswaran V, Jiang X, Tu D, Eck MJ, et al. Cyclic di-GMP sensing via

494 the innate immune signaling protein STING. Molecular cell. 2012;46(6):735-45. Epub

495 2012/06/19. doi: 10.1016/j.molcel.2012.05.029. PMID: 22705373.

496

497 9. Shu C, Yi G, Watts T, Kao CC, Li P. Structure of STING bound to cyclic di-GMP reveals

498 the mechanism of cyclic dinucleotide recognition by the immune system. Nature structural &

499 molecular biology. 2012;19(7):722-4. Epub 2012/06/26. doi: 10.1038/nsmb.2331. PMID:

500 22728658.

501

502 10. Li Y, Wilson HL, Kiss-Toth E. Regulating STING in health and disease. Journal of

503 inflammation (London, England). 2017;14:11. Epub 2017/06/10. doi: 10.1186/s12950-017-

504 0159-2. PMID: 28596706.

505

506 11. Ishikawa H, Barber GN. STING is an endoplasmic reticulum adaptor that facilitates innate  
507 immune signalling. *Nature*. 2008;455(7213):674-8. Epub 2008/08/30. doi:  
508 10.1038/nature07317. PMID: 18724357.

509

510 12. Barber GN. STING: infection, inflammation and cancer. *Nature reviews Immunology*.  
511 2015;15(12):760-70. Epub 2015/11/26. doi: 10.1038/nri3921. PMID: 26603901.

512

513 13. Liu S, Cai X, Wu J, Cong Q, Chen X, Li T, et al. Phosphorylation of innate immune adaptor  
514 proteins MAVS, STING, and TRIF induces IRF3 activation. *Science (New York, NY)*.  
515 2015;347(6227):aaa2630. Epub 2015/02/01. doi: 10.1126/science.aaa2630. PMID: 25636800.

516

517 14. Weaver BK, Kumar KP, Reich NC. Interferon regulatory factor 3 and CREB-binding  
518 protein/p300 are subunits of double-stranded RNA-activated transcription factor DRAF1.  
519 *Molecular and cellular biology*. 1998;18(3):1359-68. Epub 1998/03/06. doi:  
520 10.1128/mcb.18.3.1359. PMID: 9488451.

521

522 15. Meylan E, Tschopp J, Karin M. Intracellular pattern recognition receptors in the host  
523 response. *Nature*. 2006;442(7098):39-44. Epub 2006/07/11. doi: 10.1038/nature04946. PMID:  
524 16823444.

525

526 16. Yoneyama M, Suhara W, Fukuhara Y, Fukuda M, Nishida E, Fujita T. Direct triggering of

527 the type I interferon system by virus infection: activation of a transcription factor complex  
528 containing IRF-3 and CBP/p300. *The EMBO journal*. 1998;17(4):1087-95. Epub 1998/03/28.  
529 doi: 10.1093/emboj/17.4.1087. PMID: 9463386.

530

531 17. Raynal P, Pollard HB. Annexins: the problem of assessing the biological role for a gene  
532 family of multifunctional calcium- and phospholipid-binding proteins. *Biochimica et biophysica*  
533 *acta*. 1994;1197(1):63-93. Epub 1994/04/05. doi: 10.1016/0304-4157(94)90019-1. PMID:  
534 8155692.

535

536 18. Aliyu IA, Ling KH, Md Hashim N, Chee HY. Annexin A2 extracellular translocation and  
537 virus interaction: A potential target for antiviral drug discovery. *Reviews in medical virology*.  
538 2019;29(3):e2038. Epub 2019/02/13. doi: 10.1002/rmv.2038. PMID: 30746844.

539

540 19. Liu Y, Myrvang HK, Dekker LV. Annexin A2 complexes with S100 proteins: structure,  
541 function and pharmacological manipulation. *British journal of pharmacology*. 2015;172(7):1664-  
542 76. Epub 2014/10/11. doi: 10.1111/bph.12978. PMID: 25303710.

543

544 20. Réty S, Sopkova J, Renouard M, Osterloh D, Gerke V, Tabaries S, et al. The crystal  
545 structure of a complex of p11 with the annexin II N-terminal peptide. *Nature structural biology*.  
546 1999;6(1):89-95. Epub 1999/01/14. doi: 10.1038/4965. PMID: 9886297.

547

548 21. Oh YS, Gao P, Lee KW, Ceglia I, Seo JS, Zhang X, et al. SMARCA3, a chromatin-

549 remodeling factor, is required for p11-dependent antidepressant action. *Cell*. 2013;152(4):831-

550 43. Epub 2013/02/19. doi: 10.1016/j.cell.2013.01.014. PMID: 23415230.

551

552 22. Koga R, Kubota M, Hashiguchi T, Yanagi Y, Ohno S. Annexin A2 Mediates the Localization

553 of Measles Virus Matrix Protein at the Plasma Membrane. *Journal of virology*. 2018;92(10).

554 Epub 2018/03/02. doi: 10.1128/jvi.00181-18. PMID: 29491166.

555

556 23. Chen L, Li X, Wang H, Hou P, He H. Annexin A2 gene interacting with viral matrix protein

557 to promote bovine ephemeral fever virus release. *Journal of veterinary science*. 2020;21(2):e33.

558 Epub 2020/04/02. doi: 10.4142/jvs.2020.21.e33. PMID: 32233139.

559

560 24. Sheng C, Liu X, Jiang Q, Xu B, Zhou C, Wang Y, et al. Annexin A2 is involved in the

561 production of classical swine fever virus infectious particles. *The Journal of general virology*.

562 2015;96(Pt 5):1027-32. Epub 2015/01/17. doi: 10.1099/vir.0.000048. PMID: 25593157.

563

564 25. Saxena V, Lai CK, Chao TC, Jeng KS, Lai MM. Annexin A2 is involved in the formation of

565 hepatitis C virus replication complex on the lipid raft. *Journal of virology*. 2012;86(8):4139-50.

566 Epub 2012/02/04. doi: 10.1128/jvi.06327-11. PMID: 22301157.

567

568 26. Ma Y, Sun J, Gu L, Bao H, Zhao Y, Shi L, et al. Annexin A2 (ANXA2) interacts with

569 nonstructural protein 1 and promotes the replication of highly pathogenic H5N1 avian influenza

570 virus. *BMC microbiology*. 2017;17(1):191. Epub 2017/09/13. doi: 10.1186/s12866-017-1097-0.

571 PMID: 28893180.

572

573 27. Chang XB, Yang YQ, Gao JC, Zhao K, Guo JC, Ye C, et al. Annexin A2 binds to vimentin  
574 and contributes to porcine reproductive and respiratory syndrome virus multiplication.

575 Veterinary research. 2018;49(1):75. Epub 2018/07/29. doi: 10.1186/s13567-018-0571-5. PMID:

576 30053894.

577

578 28. Zerbe CM, Mouser DJ, Cole JL. Oligomerization of RIG-I and MDA5 2CARD domains.

579 Protein science : a publication of the Protein Society. 2020;29(2):521-6. Epub 2019/11/08. doi:

580 10.1002/pro.3776. PMID: 31697400.

581

582 29. Zhu W, Li J, Zhang R, Cai Y, Wang C, Qi S, et al. TRAF3IP3 mediates the recruitment of

583 TRAF3 to MAVS for antiviral innate immunity. The EMBO journal. 2019;38(18):e102075. Epub

584 2019/08/08. doi: 10.15252/emj.2019102075. PMID: 31390091.

585

586 30. Ishikawa H, Ma Z, Barber GN. STING regulates intracellular DNA-mediated, type I

587 interferon-dependent innate immunity. Nature. 2009;461(7265):788-92. Epub 2009/09/25. doi:

588 10.1038/nature08476. PMID: 19776740.

589

590 31. Gerke V, Moss SE. Annexins: from structure to function. Physiological reviews.

591 2002;82(2):331-71. Epub 2002/03/28. doi: 10.1152/physrev.00030.2001. PMID: 11917092.

592

593 32. Waisman DM. Annexin II tetramer: structure and function. *Molecular and cellular*  
594 *biochemistry*. 1995;149-150:301-22. Epub 1995/08/01. doi: 10.1007/bf01076592. PMID:  
595 8569746.

596

597 33. Pomerantz JL, Baltimore D. NF-kappaB activation by a signaling complex containing  
598 TRAF2, TANK and TBK1, a novel IKK-related kinase. *The EMBO journal*. 1999;18(23):6694-  
599 704. Epub 1999/12/03. doi: 10.1093/emboj/18.23.6694. PMID: 10581243.

600

601 34. Chariot A, Leonardi A, Muller J, Bonif M, Brown K, Siebenlist U. Association of the adaptor  
602 TANK with the I kappa B kinase (IKK) regulator NEMO connects IKK complexes with IKK  
603 epsilon and TBK1 kinases. *The Journal of biological chemistry*. 2002;277(40):37029-36. Epub  
604 2002/07/23. doi: 10.1074/jbc.M205069200. PMID: 12133833.

605

606 35. Clark K, Peggie M, Plater L, Sorcek RJ, Young ER, Madwed JB, et al. Novel cross-talk  
607 within the IKK family controls innate immunity. *The Biochemical journal*. 2011;434(1):93-104.  
608 Epub 2010/12/09. doi: 10.1042/bj20101701. PMID: 21138416.

609

610 36. Clark K, Takeuchi O, Akira S, Cohen P. The TRAF-associated protein TANK facilitates  
611 cross-talk within the IkappaB kinase family during Toll-like receptor signaling. *Proceedings of*  
612 *the National Academy of Sciences of the United States of America*. 2011;108(41):17093-8.  
613 Epub 2011/09/29. doi: 10.1073/pnas.1114194108. PMID: 21949249.

614

- 615 37. Chau TL, Gioia R, Gatot JS, Patrascu F, Carpentier I, Chapelle JP, et al. Are the IKKs and  
616 IKK-related kinases TBK1 and IKK-epsilon similarly activated? Trends in biochemical sciences.  
617 2008;33(4):171-80. Epub 2008/03/21. doi: 10.1016/j.tibs.2008.01.002. PMID: 18353649.  
618
- 619 38. Rescher U, Zobiack N, Gerke V. Intact Ca(2+)-binding sites are required for targeting of  
620 annexin 1 to endosomal membranes in living HeLa cells. Journal of cell science. 2000;113 ( Pt  
621 22):3931-8. Epub 2000/11/01. PMID: 11058080.  
622
- 623 39. Alvarez-Martinez MT, Porte F, Liautard JP, Sri Widada J. Effects of profilin-annexin I  
624 association on some properties of both profilin and annexin I: modification of the inhibitory  
625 activity of profilin on actin polymerization and inhibition of the self-association of annexin I and  
626 its interactions with liposomes. Biochimica et biophysica acta. 1997;1339(2):331-40. Epub  
627 1997/05/23. doi: 10.1016/s0167-4838(97)00018-6. PMID: 9187254.  
628
- 629 40. Nilius B, Gerke V, Prenen J, Szücs G, Heinke S, Weber K, et al. Annexin II modulates  
630 volume-activated chloride currents in vascular endothelial cells. The Journal of biological  
631 chemistry. 1996;271(48):30631-6. Epub 1996/11/29. doi: 10.1074/jbc.271.48.30631. PMID:  
632 8940038.  
633
- 634 41. Díaz-Muñoz M, Hamilton SL, Kaetzel MA, Hazarika P, Dedman JR. Modulation of Ca<sup>2+</sup>  
635 release channel activity from sarcoplasmic reticulum by annexin VI (67-kDa calcimedlin). The  
636 Journal of biological chemistry. 1990;265(26):15894-9. Epub 1990/09/15. PMID: 2168425.

637

638 42. Naciff JM, Behbehani MM, Kaetzel MA, Dedman JR. Annexin VI modulates Ca<sup>2+</sup> and K<sup>+</sup>  
639 conductances of spinal cord and dorsal root ganglion neurons. The American journal of  
640 physiology. 1996;271(6 Pt 1):C2004-15. Epub 1996/12/01. doi:  
641 10.1152/ajpcell.1996.271.6.C2004. PMID: 8997203.

642

643 43. Mussunoor S, Murray GI. The role of annexins in tumour development and progression.  
644 The Journal of pathology. 2008;216(2):131-40. Epub 2008/08/14. doi: 10.1002/path.2400.  
645 PMID: 18698663.

646

647 44. Madureira PA, Hill R, Miller VA, Giacomantonio C, Lee PW, Waisman DM. Annexin A2 is  
648 a novel cellular redox regulatory protein involved in tumorigenesis. Oncotarget.  
649 2011;2(12):1075-93. Epub 2011/12/22. doi: 10.18632/oncotarget.375. PMID: 22185818.

650

651 45. Yee DS, Narula N, Ramzy I, Boker J, Ahlering TE, Skarecky DW, et al. Reduced annexin  
652 II protein expression in high-grade prostatic intraepithelial neoplasia and prostate cancer.  
653 Archives of pathology & laboratory medicine. 2007;131(6):902-8. Epub 2007/06/07. doi:  
654 10.1043/1543-2165(2007)131[902:Raipai]2.0.Co;2. PMID: 17550317.

655

656 46. Scharf B, Clement CC, Wu XX, Morozova K, Zanolini D, Follenzi A, et al. Annexin A2 binds  
657 to endosomes following organelle destabilization by particulate wear debris. Nature  
658 communications. 2012;3:755. Epub 2012/03/29. doi: 10.1038/ncomms1754. PMID: 22453828.

659

660 47. Wang X, Shaw DK, Sakhon OS, Snyder GA, Sundberg EJ, Santambrogio L, et al. The  
661 Tick Protein Sialostatin L2 Binds to Annexin A2 and Inhibits NLRC4-Mediated Inflammasome  
662 Activation. *Infection and immunity*. 2016;84(6):1796-805. Epub 2016/04/06. doi:  
663 10.1128/iai.01526-15. PMID: 27045038.

664

665 48. Bist P, Shu S, Lee H, Arora S, Nair S, Lim JY, et al. Annexin-A1 regulates TLR-mediated  
666 IFN- $\beta$  production through an interaction with TANK-binding kinase 1. *Journal of immunology*  
667 (Baltimore, Md : 1950). 2013;191(8):4375-82. Epub 2013/09/21. doi:  
668 10.4049/jimmunol.1301504. PMID: 24048896.

669

670 49. Yap GLR, Sachaphibulkij K, Foo SL, Cui J, Fairhurst AM, Lim LHK. Annexin-A1 promotes  
671 RIG-I-dependent signaling and apoptosis via regulation of the IRF3-IFNAR-STAT1-IFIT1  
672 pathway in A549 lung epithelial cells. *Cell death & disease*. 2020;11(6):463. Epub 2020/06/17.  
673 doi: 10.1038/s41419-020-2625-7. PMID: 32541772.

674

675 50. Guo K, Lin X, Li Y, Qian W, Zou Z, Chen H, et al. Proteomic analysis of chicken embryo  
676 fibroblast cells infected with recombinant H5N1 avian influenza viruses with and without NS1  
677 eIF4GI binding domain. *Oncotarget*. 2018;9(9):8350-67. Epub 2018/03/02. doi:  
678 10.18632/oncotarget.23615. PMID: 29492200.

679

680 51. Takeuchi O, Akira S. MDA5/RIG-I and virus recognition. *Current opinion in immunology*.

- 681 2008;20(1):17-22. Epub 2008/02/15. doi: 10.1016/j.coi.2008.01.002. PMID: 18272355.
- 682
- 683 52. Xia P, Wang S, Gao P, Gao G, Fan Z. DNA sensor cGAS-mediated immune recognition.
- 684 Protein & cell. 2016;7(11):777-91. Epub 2016/11/01. doi: 10.1007/s13238-016-0320-3. PMID:
- 685 27696330.
- 686
- 687 53. Uccellini MB, García-Sastre A. ISRE-Reporter Mouse Reveals High Basal and Induced
- 688 Type I IFN Responses in Inflammatory Monocytes. Cell reports. 2018;25(10):2784-96.e3. Epub
- 689 2018/12/06. doi: 10.1016/j.celrep.2018.11.030. PMID: 30517866.
- 690
- 691 54. Zhang C, Shang G, Gui X, Zhang X, Bai XC, Chen ZJ. Structural basis of STING binding
- 692 with and phosphorylation by TBK1. Nature. 2019;567(7748):394-8. Epub 2019/03/08. doi:
- 693 10.1038/s41586-019-1000-2. PMID: 30842653.
- 694
- 695 55. Li P, Zhu Z, Cao W, Yang F, Ma X, Tian H, et al. Dysregulation of the RIG-I-like Receptor
- 696 Pathway Signaling by Peste des Petits Ruminants Virus Phosphoprotein. Journal of
- 697 immunology (Baltimore, Md : 1950). 2021;206(3):566-79. Epub 2021/01/01. doi:
- 698 10.4049/jimmunol.2000432. PMID: 33380495.
- 699
- 700 56. Kumar KP, McBride KM, Weaver BK, Dingwall C, Reich NC. Regulated nuclear-
- 701 cytoplasmic localization of interferon regulatory factor 3, a subunit of double-stranded RNA-
- 702 activated factor 1. Molecular and cellular biology. 2000;20(11):4159-68. Epub 2000/05/11. doi:

703 10.1128/mcb.20.11.4159-4168.2000. PMID: 10805757.

704

705 57. Wang P, Zhao W, Zhao K, Zhang L, Gao C. TRIM26 negatively regulates interferon- $\beta$

706 production and antiviral response through polyubiquitination and degradation of nuclear IRF3.

707 PLoS pathogens. 2015;11(3):e1004726. Epub 2015/03/13. doi: 10.1371/journal.ppat.1004726.

708 PMID: 25763818.

709

710 58. Zhang K, Zhang Y, Xue J, Meng Q, Liu H, Bi C, et al. DDX19 Inhibits Type I Interferon

711 Production by Disrupting TBK1-IKK $\epsilon$ -IRF3 Interactions and Promoting TBK1 and IKK $\epsilon$

712 Degradation. Cell reports. 2019;26(5):1258-72.e4. Epub 2019/01/31. doi:

713 10.1016/j.celrep.2019.01.029. PMID: 30699353.

714

715 59. Gerke V, Creutz CE, Moss SE. Annexins: linking Ca<sup>2+</sup> signalling to membrane dynamics.

716 Nature reviews Molecular cell biology. 2005;6(6):449-61. Epub 2005/06/02. doi:

717 10.1038/nrm1661. PMID: 15928709.

718

719 60. Dallacasagrande V, Hajjar KA. Annexin A2 in Inflammation and Host Defense. Cells.

720 2020;9(6). Epub 2020/06/25. doi: 10.3390/cells9061499. PMID: 32575495.

721

722 61. Zhang S, Yu M, Guo Q, Li R, Li G, Tan S, et al. Annexin A2 binds to endosomes and

723 negatively regulates TLR4-triggered inflammatory responses via the TRAM-TRIF pathway.

724 Scientific reports. 2015;5:15859. Epub 2015/11/04. doi: 10.1038/srep15859. PMID: 26527544.

725

726 62. Stukes S, Coelho C, Rivera J, Jedlicka AE, Hajjar KA, Casadevall A. The Membrane  
727 Phospholipid Binding Protein Annexin A2 Promotes Phagocytosis and Nonlytic Exocytosis of  
728 *Cryptococcus neoformans* and Impacts Survival in Fungal Infection. *Journal of immunology*  
729 (Baltimore, Md : 1950). 2016;197(4):1252-61. Epub 2016/07/03. doi:  
730 10.4049/jimmunol.1501855. PMID: 27371724.

731

732 63. Ran FA, Hsu PD, Wright J, Agarwala V, Scott DA, Zhang F. Genome engineering using  
733 the CRISPR-Cas9 system. *Nature protocols*. 2013;8(11):2281-308. Epub 2013/10/26. doi:  
734 10.1038/nprot.2013.143. PMID: 24157548.

## 735 **Figure Legends**

### 736 **Figure 1. ANXA2 inhibits type I IFN production.**

737 (A and B) ELISA and qPCR analysis of the protein levels of IFN- $\beta$  in the cell culture supernatant and  
738 mRNA levels of *Ifn $\beta$ 1* in HEK293T cells transfected with increasing amount of plasmids expressing HA-  
739 ANXA2 and then infected with SeV (1 multiplicity of infection (MOI)) for 12 h. (C and D) qPCR analysis  
740 of the mRNA levels of *Ifn $\beta$ 1* (C) and *Isg56* (D) in the HEK293T cells transfected with HA-vector or HA-  
741 ANXA2 and infected with EMCV, VSV or HSV-1 for 12 h or transfected with poly(I:C) (2  $\mu$ g/mL) or  
742 poly(dA:dT) (2  $\mu$ g/mL) for 24 h. (E and F) qPCR analysis of the mRNA levels of *Ifn $\beta$ 1* (E) and *Isg56*  
743 (F) in HeLa-*Anxa2*<sup>+/+</sup> and HeLa-*Anxa2*<sup>-/-</sup> cells after infection with EMCV, VSV or HSV-1 for 12 h or  
744 transfected with poly(I:C) or cGAMP for 24 h. (G) Immunoblot analysis of ANXA2 expression in the  
745 HeLa-*Anxa2*<sup>+/+</sup> cells, HeLa-*Anxa2*<sup>-/-</sup> cells and HeLa-*Anxa2*<sup>-/-</sup> cells transfected with a plasmid expressing  
746 HA-ANXA2. (H) qPCR analysis of the mRNA levels of *Ifn $\beta$ 1* in the HeLa-*Anxa2*<sup>+/+</sup> cells, HeLa-*Anxa2*<sup>-/-</sup>  
747 cells and HeLa-*Anxa2*<sup>-/-</sup> cells transfected with a plasmid expressing HA-ANXA2 with or without EMCV  
748 infection for 12 h. (I and J) HeLa-*Anxa2*<sup>+/+</sup> cells and HeLa-*Anxa2*<sup>-/-</sup> cells transfected with an empty vector

749 or a plasmid expressing ANXA2 were infected with SeV for 12 h. The cell supernatants were placed  
750 under ultraviolet (UV) aseptically irradiated for 12 h and then added to HEK293T cells and incubated  
751 for 24 h, and the HEK293T cells were infected with VSV-GFP. After 12 h, the replication of VSV-GFP  
752 was analyzed using a fluorescence microscope.

753 **Figure 2. ANXA2 deficiency enhances cellular antiviral responses.**

754 (A-C) qPCR analysis of the mRNA levels of *Ifnβ1* in *Anxa2<sup>+/+</sup>* and *Anxa2<sup>-/-</sup>* peritoneal macrophages  
755 infected with EMCV (2 MOI) (A), VSV (0.2 MOI) (B), and HSV-1 (10 MOI) (C) for 0, 4, 8 or 12 h.  
756 (D-F) qPCR analysis of the mRNA levels of *Isg56* in peritoneal macrophages isolated from the *Anxa2<sup>+/+</sup>*  
757 and *Anxa2<sup>-/-</sup>* mice infected with EMCV (D), VSV (E), and HSV-1(F) for 0, 4, 8 or 12 h. (G-I) qPCR  
758 analysis of the mRNA levels of *Mxl1* in the peritoneal macrophages isolated from *Anxa2<sup>+/+</sup>* and *Anxa2<sup>-/-</sup>*  
759 mice infected with EMCV (G), VSV (H), and HSV-1 (I) for 0, 4, 8 or 12 h. (J-L) qPCR analysis of the  
760 genomic copy numbers of EMCV (J), VSV (K) or HSV-1 (L) in the peritoneal macrophages isolated  
761 from *Anxa2<sup>+/+</sup>* and *Anxa2<sup>-/-</sup>* mice infected with EMCV, VSV or HSV-1 for 0, 4, 8 or 12 h. \**P* < 0.05,  
762 \*\**P* < 0.01 and \*\*\**P* < 0.001 (two-tailed Student's t-test (A-L). Data are representative of three  
763 independent experiments with three biological replicates (mean ± s.d. in A-L).

764 **Figure 3. ANXA2 deficiency positively regulates antiviral responses in vivo.**

765 (A-D) The *Anxa2<sup>+/+</sup>* and *Anxa2<sup>-/-</sup>* mice (four mice per group) infected by the intraperitoneal injection of  
766 EMCV ( $2 \times 10^5$  plaque-forming units (PFU) per mouse) for 48 h (A and B) and 72 h (C and D). The  
767 mRNA levels of *Ifnβ1* in the heart (A, C) and brain (B, D) were analyzed by qPCR analysis. The mRNA  
768 results are presented relative to those of mock infected WT cells. (E) Detection of the IFN-β levels in  
769 serum from mice by ELISA as in A and C. (F) qPCR analysis of EMCV RNA in the heart of *Anxa2<sup>+/+</sup>*  
770 and *Anxa2<sup>-/-</sup>* mice as in A and C; results are presented as in A and C. (G) Hematoxylin and eosin-stained  
771 images of heart and brain sections from *Anxa2<sup>+/+</sup>* and *Anxa2<sup>-/-</sup>* mice infected with EMCV for 96 h. Scale  
772 bars, 50 μm. (H) Inflammation score of (G): normal = 0, mild = 1, moderate = 2, and severe = 3 ( $n \geq 3$ ,  
773 average score). \**P* < 0.05, \*\**P* < 0.01 and \*\*\**P* < 0.001 (two-tailed Student's t-test (A-G)). Data are  
774 representative of three independent experiments with three biological replicates (mean ± s.d. in A-F) or  
775 are representative of three independent experiments with similar results (G).

776 **Figure 4. ANXA2 inhibits type I IFN production upstream IRF3 phosphorylation.**

777 (A) qPCR analysis of the mRNA levels of *Ifnβ1* in the HEK293T cells transfected with a plasmid  
778 expressing RIG-I, MDA-5, MAVS, cGAS+STING, TBK1, IKKε or IRF3-5D, along with an empty  
779 vector or a plasmid expressing ANXA2. (B and C) Luc activity of the IFN-β-luc (A) or ISRE-luc (B)  
780 reporter in the HEK293T-*Anxa2*<sup>+/+</sup> and HEK293T-*Anxa2*<sup>-/-</sup> cells transfected with an IFN-β-luc or ISRE-  
781 Luc reporter and a Renilla-TK reporter together with a plasmid expressing RIG-I, MDA-5, MAVS,  
782 cGAS+STING, TBK1, IKKε or IRF3-5D, along with an empty vector or a plasmid expressing ANXA2.  
783 (D-F) HEK293T cells were transfected with an empty vector or a plasmid expressing HA-ANXA2 and  
784 then mock infected or infected with VSV (D), EMCV (E) or HSV-1 (F). Immunoblot analysis of IRF3,  
785 phosphorylated IRF3, EMCV VP1 protein, HSV-1 gD protein, and GAPDH. (G, H) HEK293T-*Anxa2*<sup>+/+</sup>  
786 and HEK293T-*Anxa2*<sup>-/-</sup> cells were mock infected or infected with VSV (G) or HSV-1 (H). The cells were  
787 collected for immunoblot analysis of IRF3, phosphorylated IRF3, EMCV protein, HSV-1 protein, and  
788 GAPDH. (I) HeLa cells were transfected with a plasmid encoding ANXA2 or IRF3 alone or both. At 24  
789 hpt, the cells were then infected with SeV for 12 h. The localization of IRF3 was detected by laser  
790 scanning confocal microscope. (J) HEK293T cells were transfected with increasing a plasmid encoding  
791 ANXA2, and then infected with VSV. IRF3 in the nuclear and cytoplasmic compartments was detected  
792 by Western blotting. (K) HEK293T-*Anxa2*<sup>+/+</sup> and HEK293T-*Anxa2*<sup>-/-</sup> cells were infected with VSV.  
793 IRF3 in the nuclear and cytoplasmic compartments was detected by Western blotting. Lamin B and  
794 GAPDH were used as nuclear and cytosolic markers.

795 **Figure 5. ANXA2 inhibits the recruitment of MAVS by MDA5.**

796 (A) Co-IP analysis of the interaction between ANXA2 and immune molecules in the HEK293T cells  
797 transfected with plasmids expressing HA-ANXA2 and Flag tagged RIG-I, MDA-5, MAVS,  
798 cGAS+STING, TBK1, IKKε or IRF3 as indicated. IP, immunoprecipitation. (B) Co-IP analysis of the  
799 interaction between ANXA2 and MDA5 in HEK293T cells transfected with plasmids expressing HA-  
800 ANXA2 and Flag-MDA5. (C) Co-IP analysis of the interaction between endogenous ANXA2 and MDA5  
801 in mouse peritoneal macrophages that were mock infected or infected with EMCV. (D) MDA5 and its  
802 truncation mutants (top). Co-IP analysis of the interaction between ANXA2 and MDA5 or its deleted

803 mutants in HEK293T cells transfected with a plasmid expressing HA-ANXA2 together with vector or  
804 Flag-MDA5 and its deleted mutants (below). (E) Co-IP analysis of the interactions among ANXA2,  
805 MDA5 and MAVS in the HEK293T cells transfected with plasmids expressing Flag-MAVS together  
806 with HA-MDA5 and vector or increasing amount of a plasmid encoding HA-ANXA2. (F) Co-IP analysis  
807 of the interaction between endogenous MDA5 and MAVS in mouse peritoneal macrophages that were  
808 mock infected or infected with EMCV.

809 **Figure 6. ANXA2 disrupts the interaction between MAVS and TRAF3.**

810 (A) Co-IP analysis of the interaction between ANXA2 and MAVS in HEK293T cells transfected with  
811 plasmids expressing HA-ANXA2 and Flag-MAVS. (B) Co-IP analysis of the interaction between  
812 endogenous ANXA2 and MAVS in mouse peritoneal macrophages that were mock infected or infected  
813 with EMCV. (C) MAVS and its truncation mutants (top) and Co-IP analysis of the interaction between  
814 ANXA2 and MAVS or its deleted mutants in HEK293T cells transfected with a plasmid expressing HA-  
815 ANXA2 together with vector or Flag-MAVS and its deleted mutants (below). (D) Co-IP analysis of the  
816 interactions among ANXA2, TRAF3 and MAVS in the HEK293T cells transfected with plasmids  
817 expressing Flag-MAVS together with HA-TRAF3 and vector or increasing amount of a plasmid encoding  
818 HA-ANXA2. (E) Co-IP analysis of the interaction between endogenous MAVS and TRAF3 in mouse  
819 peritoneal macrophages that were mock infected or infected with EMCV. (F) The subcellular localization  
820 of MAVS in HEK293T cells expressing Flag-MAVS alone or together with GFP-ANXA2 was detected  
821 by immunofluorescence microscopy. Scale bars, 5  $\mu$ m. (G) The subcellular localization of MAVS in  
822 HEK293T-*Anxa2*<sup>+/+</sup> and HEK293T-*Anxa2*<sup>-/-</sup> cells were detected by immunofluorescence microscopy.  
823 Scale bars, 5  $\mu$ m.

824 **Figure 7. ANXA2 inhibits the location of STING on Golgi apparatus**

825 (A) Co-IP analysis of the interaction between ANXA2 and STING in the HEK293T cells transfected  
826 with plasmids expressing HA-ANXA2 and Flag-STING. (B) Co-IP analysis of the interaction between  
827 endogenous ANXA2 and STING in mouse peritoneal macrophages that were mock infected or infected  
828 with HSV-1. (C) ANXA2 and its truncation mutants (top) and Co-IP analysis of the interaction between  
829 ANXA2 and STING or its deleted mutants in HEK293T cells transfected with a plasmid expressing Flag-

830 STING together with vector or HA-ANXA2 and its deleted mutants. (D) The subcellular localization of  
831 STING in HEK293T cells expressing Flag-STING alone or together with GFP-ANXA2 as detected by  
832 immunofluorescence microscopy. Scale bars, 5  $\mu$ m. (E) Western blotting analysis of STING  
833 phosphorylation upon HSV-1 infection mouse peritoneal macrophages for 0, 4, 8, 12 h.

834 **Figure 8. ANXA2 interacts with IRF3.**

835 (A) *In vitro* analysis of the interaction between ANXA2 and IRF3 in the HEK293T cells transfected with  
836 plasmids expressing HA-ANXA2 and Flag-IRF3. (B) Immunoprecipitation and immunoblot analysis of  
837 the interaction of endogenous ANXA2 and IRF3 in mouse peritoneal macrophages infected with VSV  
838 (B) or HSV-1 (C) at the indicated times. (D) The subcellular localization of ANXA2 and IRF3 in  
839 HEK293T cells expressing HA-ANXA2 and Flag-IRF3 as detected by immunofluorescence microscopy.  
840 Scale bars, 5  $\mu$ m. (E) IRF3 and its deleted mutants (top) and the Co-IP analysis of the interaction between  
841 HA-ANXA2 and Flag-IRF3 or its deleted mutants in HEK293T cells (below). (F) Co-IP analysis of the  
842 interaction between Flag-IRF3 and HA-ANXA2 or its deleted mutants in HEK293T cells. (G) Luc  
843 activity of the IFN- $\beta$ -luc reporter in HEK293T cells transfected with an IFN- $\beta$ -Luc reporter and a  
844 Renilla-TK reporter, together with a plasmid expressing Flag-TBK1 and HA-ANXA2 or its deleted  
845 mutants. (H) qPCR analysis of *Ifn $\beta$ 1* mRNA levels in HEK293T cells transfected with a plasmid  
846 expressing Flag-TBK1 and HA-ANXA2 or its mutants. \*\*\* $P < 0.001$  (two-tailed Student's t-test). Data  
847 are representative of three independent experiments with three biological replicates (mean  $\pm$  s.d. in A-  
848 C).

849 **Figure 9. ANXA2 disrupts TBK1-IKK $\epsilon$ -IRF3 complex.**

850 (A, B) HEK293T cells were transfected with a plasmid encoding Flag-IRF3 alone or together with a  
851 plasmid expressing HA-TBK1 (A) or HA-IKK $\epsilon$  (B) and different amounts of plasmids encoding HA-  
852 ANXA2 as indicated. At 24 hpi, Co-IP was performed with anti-FLAG. (C-F) Immunoprecipitation and  
853 immunoblot analysis of the interaction of endogenous TBK1 or IKK $\epsilon$  and IRF3 in HEK293T-*Anxa2*<sup>+/+</sup>  
854 and HEK293T-*Anxa2*<sup>-/-</sup> cells (C, D) or mouse peritoneal macrophages (E, F) mock infected or infected  
855 with VSV or HSV-1.

856 **Figure 10. Schematic model of ANXA2's inhibition of type I IFN production.**

857        Upon virus infection, viral genomic RNA was recognized by MDA5/RIG-I, and viral genomic DNA  
858 was recognized by cGAS to induce type I IFN production to activate host antiviral responses. To  
859 antagonize host antiviral innate immune response, both RNA virus and DNA virus infection induce  
860 ANXA2 expression, which not only inhibits the interaction between MDA5 and MAVS induced by RNA  
861 virus but also inhibits the localization of STING on Golgi apparatus induced by DNA virus. In addition,  
862 ANXA2 also competes with TBK1 or IKK $\epsilon$  to bind to IRF3 to inhibit IRF3 phosphorylation and nuclear  
863 translocation.  
864

**Figure 1**



**Figure**



**Figure 3**



Figure

# A Figure 4



# B



# C



# D



# E



# F



# G



# H



# I



# J



# K



**Figure 5**



Figure

# Figure 6

## A



## B



## C



## D



## E



## F



## G



## Figure 7

### A



### B



### C



### D



### E



**Figure 8****Figure**

**Figure 9****A****B****C****D****E****F**

Figure 10



Figure

# Figure S1



Figure S2



Figure

**Figure S3**

**A**



**B**



**C**



Figure

## Figure S4



**Figure S5**



**Figure**

# Figure S6

## A



## B



## C



## D
